# Supplementary material for: Concurrent Expression of Oct4 and Nanog Maintains Mesenchymal Stem-Like Property of Human Dental Pulp Cells
Source: MDPI journal article supplement (doi:10.3390/ijms151018623), 2014-10-15

# Supplementary Information

**Figure S1.** Single over-expression of *Oct4* or *Nanog* expression did not alter proliferation rate and ALP activity in DPCs. The over-expression effect of *Oct4* (A) or *Nanog* (B) DPCs was validated translationally by western blotting. Immunoblotting against anti-*Oct4*, anti-*Nanog*, or anti-GAPDH antibodies was performed as indicated. The amount of GAPDH protein of different crude cell extracts was referred to as loading control and for further quantification; The proliferation rate of *Oct4* (C) or *Nanog* (D) over-expression in DPCs was analyzed by a MTT assay; (E) The expression of STRO-1 and CD146 of *Oct4* or *Nanog*-overexpressing DPCs was analyzed by flow cytometry analysis; (F) ALP activity of *Oct4* or *Nanog*-overexpressing DPCs was analyzed. Data shown here are the mean  $\pm$  SD of three independent experiments.

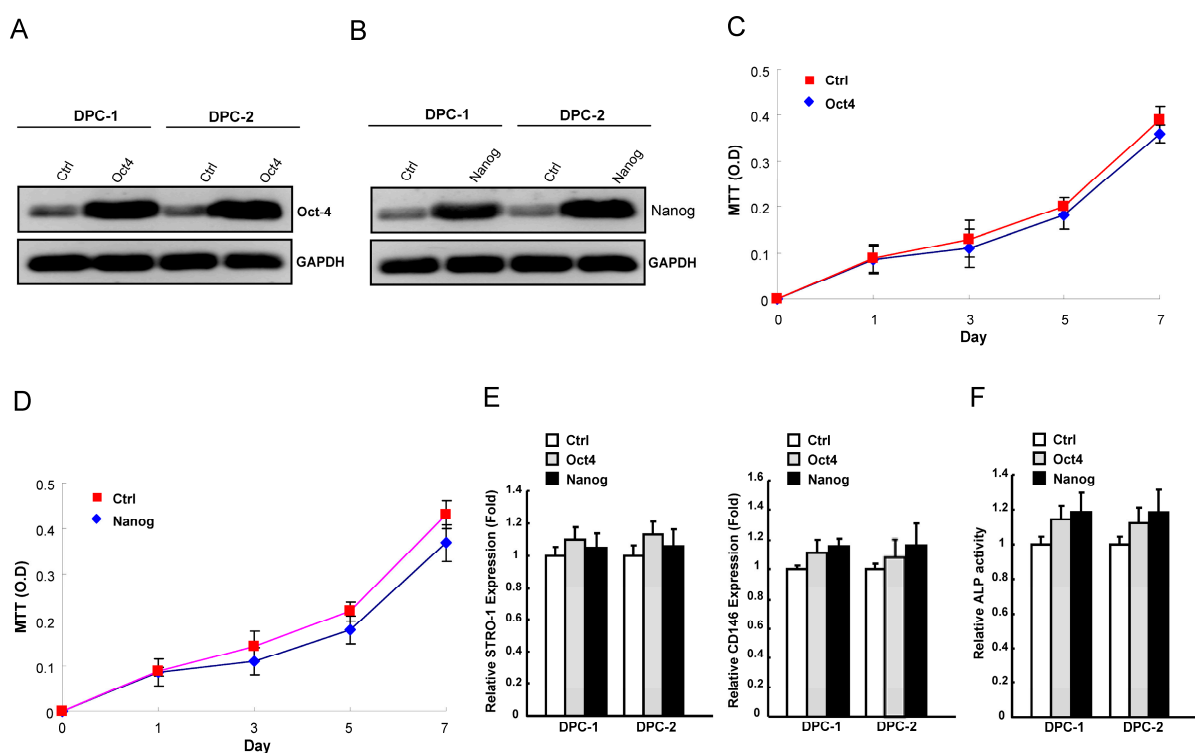

Supplement: s1 [file s1]
